# Supplementary material for: The RNA m5C methyltransferase NSUN1 modulates human malaria gene expression during intraerythrocytic development
Source: Front Cell Infect Microbiol. 2024 Oct 7;14:1474229. doi: 10.3389/fcimb.2024.1474229 (PMC11491294; doi:10.3389/fcimb.2024.1474229)
Supplement: Supplementary file 3 [file Table1.xlsx]

## Sheet: Table name
Table S1. The DEGs of pfnsun1-ty1-glmS strain with or without GlcN at R, T and S stages.

## Sheet: R stage_down-regulated genes
Gene ID	Gene Name	Product Description
PF3D7_0102400	N/A	lysophospholipase, putative, pseudogene
PF3D7_0102600	FIKK1	serine/threonine protein kinase, FIKK family
PF3D7_0106200	N/A	EF hand domain-containing protein, putative
PF3D7_0106500	N/A	conserved Plasmodium protein, unknown function
PF3D7_0201500	N/A	Plasmodium exported protein (hyp9), unknown function
PF3D7_0201900	EMP3	erythrocyte membrane protein 3
PF3D7_0205600	N/A	conserved Plasmodium protein, unknown function
PF3D7_0217200	N/A	conserved Plasmodium protein, unknown function
PF3D7_0218200	N/A	SUZ domain-containing protein, putative
PF3D7_0220300	N/A	Plasmodium exported protein, unknown function
PF3D7_0220500	N/A	Plasmodium exported protein (hyp2), unknown function
PF3D7_0220600	N/A	Plasmodium exported protein (hyp9), unknown function
PF3D7_0221200	N/A	Plasmodium exported protein (hyp15), unknown function
PF3D7_0304300	N/A	conserved Plasmodium protein, unknown function
PF3D7_0311700	PM6	plasmepsin VI
PF3D7_0312900	N/A	hypothetical protein
PF3D7_0316700	YOP1	protein YOP1, putative
PF3D7_0317100	B9	6-cysteine protein B9
PF3D7_0317500	EG5	kinesin-5
PF3D7_0319800	N/A	conserved Plasmodium protein, unknown function
PF3D7_0404500	P52	6-cysteine protein P52
PF3D7_0404600	N/A	conserved Plasmodium membrane protein, unknown function
PF3D7_0404800	N/A	sporozoite-specific protein S10, putative
PF3D7_0405300	LISP2	liver specific protein 2, putative
PF3D7_0406900	N/A	conserved Plasmodium protein, unknown function
PF3D7_0410500	N/A	conserved Plasmodium protein, unknown function
PF3D7_0412600	RIF	rifin, pseudogene
PF3D7_0412800	N/A	Plasmodium RNA of unknown function RUF6
PF3D7_0413000	N/A	Plasmodium RNA of unknown function RUF6
PF3D7_0414500	N/A	male development protein MD5, putative
PF3D7_0420200	ACPS	holo-[acyl-carrier-protein] synthase, putative
PF3D7_0420400	RRF2	ribosome-recycling factor
PF3D7_0500900	FIKK5	serine/threonine protein kinase, FIKK family
PF3D7_0508400	N/A	CFA20 domain-containing protein, putative
PF3D7_0516600	MB2	sporozoite surface antigen MB2
PF3D7_0517100	N/A	conserved protein, unknown function
PF3D7_0517200	N/A	WD repeat-containing protein, putative
PF3D7_0522900	N/A	zinc finger protein, putative
PF3D7_0528900	N/A	conserved protein, unknown function
PF3D7_0532200	N/A	Plasmodium exported protein (PHISTc), unknown function
PF3D7_0532500	N/A	Plasmodium exported protein, unknown function
PF3D7_0606400	N/A	conserved Plasmodium protein, unknown function
PF3D7_0606800	VFT1	VFT protein
PF3D7_0616500	TLP	TRAP-like protein
PF3D7_0617300	N/A	RNA-binding protein, putative
PF3D7_0621400	ALV7	Pf77 protein
PF3D7_0622100	N/A	conserved Plasmodium protein, unknown function
PF3D7_0622300	N/A	vacuolar transporter chaperone, putative
PF3D7_0623700	SUV3	ATP-dependent RNA helicase SUV3, putative
PF3D7_0623900	N/A	ribonuclease H2 subunit A, putative
PF3D7_0624100	N/A	conserved protein, unknown function
PF3D7_0703400	N/A	conserved Plasmodium protein, unknown function
PF3D7_0703800	N/A	conserved Plasmodium protein, unknown function
PF3D7_0704900	RF2	peptide chain release factor 2
PF3D7_0705600	N/A	RNA helicase, putative
PF3D7_0708600	IMC1d	inner membrane complex protein 1d, putative
PF3D7_0708700	COX4	cytochrome c oxidase subunit 4, putative
PF3D7_0710500	N/A	conserved protein, unknown function
PF3D7_0711200	N/A	conserved Plasmodium protein, unknown function
PF3D7_0713600	N/A	ribosomal protein S5, mitochondrial, putative
PF3D7_0718600	N/A	conserved Plasmodium protein, unknown function
PF3D7_0721500	N/A	conserved Plasmodium membrane protein, unknown function
PF3D7_0721700	PSOP1	secreted ookinete protein, putative
PF3D7_0722800	N/A	conserved protein, unknown function
PF3D7_0723700	N/A	metallo-hydrolase/oxidoreductase, putative
PF3D7_0731700	N/A	Plasmodium exported protein (hyp9), unknown function
PF3D7_0810700	N/A	conserved Plasmodium protein, unknown function
PF3D7_0810800	PPPK-DHPS	hydroxymethyldihydropterin pyrophosphokinase-dihydropteroate synthase
PF3D7_0812000	N/A	conserved protein, unknown function
PF3D7_0817300	N/A	conserved Plasmodium protein, unknown function
PF3D7_0818600	PBLP	BEM46-like protein, putative
PF3D7_0819200	PLP5	perforin-like protein 5
PF3D7_0819500	N/A	conserved protein, unknown function
PF3D7_0820800	N/A	conserved Plasmodium protein, unknown function
PF3D7_0822500	DLC1	dynein light chain 1
PF3D7_0822700	TRP1	thrombospondin-related protein 1, putative
PF3D7_0823400	N/A	alpha/beta hydrolase, putative
PF3D7_0823500	IMC1i	inner membrane complex protein 1i, putative
PF3D7_0823600	LipB	lipoate-protein ligase B
PF3D7_0826600	VAMP7	SNARE protein, putative
PF3D7_0826900	N/A	conserved Plasmodium protein, unknown function
PF3D7_0827200	N/A	conserved Plasmodium protein, unknown function
PF3D7_0827400	N/A	conserved protein, unknown function
PF3D7_0830300	SIAP2	sporozoite invasion-associated protein 2
PF3D7_0831750	N/A	Plasmodium exported protein (PHISTa), unknown function, pseudogene
PF3D7_0911800	N/A	conserved Plasmodium protein, unknown function
PF3D7_0912600	N/A	conserved Plasmodium protein, unknown function
PF3D7_0913100	N/A	heptatricopeptide repeat-containing protein, putative
PF3D7_0915300	N/A	heptatricopeptide repeat-containing protein, putative
PF3D7_0923300	PLP3	perforin-like protein 3
PF3D7_0925100	N/A	conserved Plasmodium protein, unknown function
PF3D7_0925800	UPF2	regulator of nonsense transcripts 2, putative
PF3D7_0927700	PPP4	serine/threonine protein phosphatase 4, putative
PF3D7_0930900	NFU1	NifU-like protein, putative
PF3D7_0931300	N/A	conserved Plasmodium protein, unknown function
PF3D7_0932700	N/A	conserved Plasmodium protein, unknown function
PF3D7_0933100	N/A	conserved Plasmodium protein, unknown function
PF3D7_1001000	CSA-L	chondroitin sulfate A ligand
PF3D7_1001300	N/A	Plasmodium exported protein (PHISTa), unknown function
PF3D7_1003700	N/A	MKT1 domain-containing protein, putative
PF3D7_1006100	NOT5	CCR4-NOT transcription complex subunit 5, putative
PF3D7_1009100	N/A	conserved Plasmodium membrane protein, unknown function
PF3D7_1012800	N/A	conserved Plasmodium protein, unknown function
PF3D7_1019300	N/A	zinc finger protein, putative
PF3D7_1026900	HCS1	biotin--protein ligase 1
PF3D7_1027000	N/A	conserved Plasmodium protein, unknown function
PF3D7_1028100	PPO	protoporphyrinogen oxidase
PF3D7_1029300	N/A	conserved protein, unknown function
PF3D7_1032000	RimM	ribosome maturation factor RimM, putative
PF3D7_1035800	M712	probable protein, unknown function
PF3D7_1037000	REV3	DNA polymerase zeta catalytic subunit, putative
PF3D7_1037800	N/A	WD repeat-containing protein, putative
PF3D7_1038700	N/A	Plasmodium exported protein, unknown function
PF3D7_1103500	N/A	CPW-WPC family protein
PF3D7_1105300	N/A	conserved Plasmodium protein, unknown function
PF3D7_1107900	MSCS	mechanosensitive ion channel protein, putative
PF3D7_1109100	N/A	conserved Plasmodium protein, unknown function
PF3D7_1109200	N/A	conserved Plasmodium protein, unknown function
PF3D7_1110000	N/A	conserved Plasmodium protein, unknown function
PF3D7_1113500	N/A	GTP-binding protein, putative
PF3D7_1115100	N/A	conserved protein, unknown function
PF3D7_1118200	N/A	heat shock protein 90, putative
PF3D7_1122100	GPI16	GPI transamidase component GPI16, putative
PF3D7_1122500	KIC10	protein KIC10
PF3D7_1124200	N/A	thioredoxin-like protein, putative
PF3D7_1130000	PAGM	phosphoacetylglucosamine mutase, putative
PF3D7_1131900	N/A	conserved Plasmodium protein, unknown function
PF3D7_1132100	N/A	RNA-binding protein, putative
PF3D7_1134900	N/A	conserved Plasmodium protein, unknown function
PF3D7_1135200	N/A	regulator of chromosome condensation, putative, pseudogene
PF3D7_1138900	N/A	non-coding RNA
PF3D7_1139300	AP2-G5	AP2 domain transcription factor AP2-G5
PF3D7_1139400	N/A	non-coding RNA
PF3D7_1144100	N/A	mitochondrial large subunit ribosomal protein, putative
PF3D7_1144200	N/A	conserved Plasmodium protein, unknown function
PF3D7_1144400	N/A	conserved Plasmodium protein, unknown function
PF3D7_1144800	N/A	conserved Plasmodium protein, unknown function
PF3D7_1149400	N/A	Plasmodium exported protein, unknown function
PF3D7_1200500	RIF	rifin
PF3D7_1201100	N/A	RESA-like protein with PHIST and DnaJ domains
PF3D7_1204400	G37	sexual stage-specific protein G37, putative
PF3D7_1206800	N/A	conserved Plasmodium protein, unknown function
PF3D7_1206900	N/A	conserved Plasmodium protein, unknown function
PF3D7_1208200	CRMP3	cysteine repeat modular protein 3
PF3D7_1212800	SDHB	succinate dehydrogenase [ubiquinone] iron-sulfur subunit, mitochondrial
PF3D7_1216700	PLP2	perforin-like protein 2
PF3D7_1217300	EngA	GTP-binding protein EngA
PF3D7_1217400	N/A	conserved protein, unknown function
PF3D7_1220000	N/A	female development protein FD4, putative
PF3D7_1229200	N/A	non-coding RNA
PF3D7_1231700	N/A	conserved protein, unknown function
PF3D7_1233700	N/A	homocysteine S-methyltransferase, putative
PF3D7_1234400	MiGS	microgamete surface protein MiGS, putative
PF3D7_1234700	ULG8	upregulated in late gametocytes ULG8
PF3D7_1246000	N/A	conserved Plasmodium protein, unknown function
PF3D7_1248600	N/A	conserved Plasmodium protein, unknown function
PF3D7_1251000	N/A	HSP20-like chaperone, putative
PF3D7_1301300	N/A	Plasmodium exported protein (PHISTa-like), unknown function, pseudogene
PF3D7_1302900	N/A	conserved protein, unknown function
PF3D7_1312000	MCAT	malonyl CoA-acyl carrier protein transacylase
PF3D7_1314800	N/A	ubiquitin-like protein, putative
PF3D7_1316600	CCT	choline-phosphate cytidylyltransferase
PF3D7_1316700	N/A	conserved protein, unknown function
PF3D7_1317200	ApiAP2	AP2 domain transcription factor AP2-FG, putative
PF3D7_1318300	N/A	conserved Plasmodium protein, unknown function
PF3D7_1319200	N/A	tetratricopeptide repeat protein, putative
PF3D7_1323000	FabZ	beta-hydroxyacyl-ACP dehydratase
PF3D7_1328700	N/A	Plasmodium RNA of unknown function RUF1
PF3D7_1328800	SIR2A	transcriptional regulatory protein sir2a
PF3D7_1333500	N/A	conserved Plasmodium protein, unknown function
PF3D7_1334600	MSRP3	MSP7-like protein
PF3D7_1335900	TRAP	thrombospondin-related anonymous protein
PF3D7_1340000	PSOP7	secreted ookinete protein, putative
PF3D7_1341100	N/A	U6 spliceosomal RNA
PF3D7_1342100	IRP	aconitate hydratase
PF3D7_1346200	N/A	nuclear import protein MOG1, putative
PF3D7_1351600	GK	glycerol kinase
PF3D7_1356900	PK5	protein kinase 5
PF3D7_1357200	GluRS	glutamate--tRNA ligase
PF3D7_1358600	N/A	zinc finger protein, putative
PF3D7_1362100	14-3-3II	14-3-3 protein
PF3D7_1364600	N/A	aldehyde reductase, putative
PF3D7_1366100	DIP13	DIP13 homolog, putative
PF3D7_1366200	N/A	conserved protein, unknown function
PF3D7_1367500	N/A	NADH-cytochrome b5 reductase, putative
PF3D7_1372400	ACS4	acyl-CoA synthetase
PF3D7_1372500	N/A	stevor, pseudogene
PF3D7_1372600	RIF	rifin
PF3D7_1403800	MISFIT	nuclear formin-like protein MISFIT, putative
PF3D7_1410500	N/A	conserved Plasmodium protein, unknown function
PF3D7_1413000	N/A	conserved Plasmodium protein, unknown function
PF3D7_1415700	SPT	serine palmitoyltransferase, putative
PF3D7_1419200	ATrx1	thioredoxin-like protein, putative
PF3D7_1422100	N/A	ribosomal protein L21, mitochondrial, putative
PF3D7_1426500	ABCG2	ABC transporter G family member 2
PF3D7_1427000	N/A	conserved Plasmodium protein, unknown function
PF3D7_1430500	N/A	conserved Plasmodium protein, unknown function
PF3D7_1431800	E-NTPDase	apyrase, putative
PF3D7_1432900	N/A	SF-assemblin, putative
PF3D7_1435900	N/A	conserved Plasmodium protein, unknown function
PF3D7_1437100	N/A	conserved protein, unknown function
PF3D7_1444900	N/A	conserved protein, unknown function
PF3D7_1445300	N/A	ribosomal protein S29, mitochondrial, putative
PF3D7_1446100	N/A	conserved Plasmodium protein, unknown function
PF3D7_1446300	N/A	conserved Plasmodium membrane protein, unknown function
PF3D7_1446900	N/A	glutaminyl-peptide cyclotransferase, putative
PF3D7_1447300	N/A	ribosomal protein S14, mitochondrial, putative
PF3D7_1447500	IMC20	inner membrane complex protein, putative
PF3D7_1451000	N/A	conserved Plasmodium protein, unknown function
PF3D7_1451300	NSE2	E3 SUMO-protein ligase NSE2, putative
PF3D7_1452200	N/A	aminomethyltransferase, putative
PF3D7_1454300	KIN	SNF1-related serine/threonine protein kinase KIN
PF3D7_1454800	N/A	conserved Plasmodium protein, unknown function
PF3D7_1456600	N/A	ribosomal protein L28, mitochondrial, putative
PF3D7_1457100	N/A	conserved Plasmodium protein, unknown function
PF3D7_1457400	N/A	conserved Plasmodium protein, unknown function
PF3D7_1459100	N/A	GTP-binding protein, putative
PF3D7_1459500	N/A	conserved Plasmodium protein, unknown function
PF3D7_1460200	N/A	conserved protein, unknown function
PF3D7_1461500	MND1	meiotic nuclear division protein 1, putative
PF3D7_1465500	K2	potassium channel K2
PF3D7_1468300	LRR14.1	leucine-rich repeat protein
PF3D7_1476100	ETRAMP14.2	early transcribed membrane protein 14.2
PF3D7_1478900	N/A	non-coding RNA

## Sheet: T stage_down-regulated genes
Gene ID	Gene Name	Product Description
PF3D7_0100400	RIF	rifin
PF3D7_0103000	N/A	vacuolar protein sorting-associated protein VTA1, putative
PF3D7_0103800	ARP1	actin-related protein ARP1, putative
PF3D7_0104100	N/A	protein E140, putative
PF3D7_0105400	N/A	conserved Plasmodium protein, unknown function
PF3D7_0109850	N/A	phosphatidate cytidylyltransferase, putative
PF3D7_0112300	N/A	18S ribosomal RNA
PF3D7_0112700	N/A	28S ribosomal RNA
PF3D7_0115050	N/A	H/ACA snoRNA
PF3D7_0202800	N/A	conserved Plasmodium protein, unknown function
PF3D7_0206800	MSP2	merozoite surface protein 2
PF3D7_0207400	SERA7	serine repeat antigen 7
PF3D7_0207500	SERA6	serine repeat antigen 6
PF3D7_0207600	SERA5	serine repeat antigen 5
PF3D7_0207700	SERA4	serine repeat antigen 4
PF3D7_0207800	SERA3	serine repeat antigen 3
PF3D7_0207900	SERA2	serine repeat antigen 2
PF3D7_0208000	SERA1	serine repeat antigen 1
PF3D7_0209600	N/A	transporter, putative
PF3D7_0216800	N/A	TMEM121 domain-containing protein, putative
PF3D7_0217000	N/A	conserved Plasmodium membrane protein, unknown function
PF3D7_0217500	CDPK1	calcium-dependent protein kinase 1
PF3D7_0220800	CLAG2	cytoadherence linked asexual protein 2
PF3D7_0302200	CLAG3.2	cytoadherence linked asexual protein 3.2
PF3D7_0302500	CLAG3.1	cytoadherence linked asexual protein 3.1
PF3D7_0303400	DHHC1	palmitoyltransferase DHHC1
PF3D7_0303900	N/A	phosphatidylethanolamine-binding protein, putative
PF3D7_0308100	N/A	zinc finger protein, putative
PF3D7_0310100	CDPK3	calcium-dependent protein kinase 3
PF3D7_0310400	PIESP1	parasite-infected erythrocyte surface protein
PF3D7_0312900	N/A	hypothetical protein
PF3D7_0314800	N/A	conserved Plasmodium protein, unknown function
PF3D7_0314900	N/A	conserved Plasmodium membrane protein, unknown function
PF3D7_0318000	N/A	conserved Plasmodium protein, unknown function
PF3D7_0321100	N/A	conserved Plasmodium protein, unknown function
PF3D7_0321400	pPK1	pseudo protein kinase 1, putative
PF3D7_0322200	N/A	conserved protein, unknown function
PF3D7_0404700	DPAP3	dipeptidyl aminopeptidase 3
PF3D7_0404800	N/A	sporozoite-specific protein S10, putative
PF3D7_0404900	P41	6-cysteine protein P41
PF3D7_0405200	CERLI2	protein CERLI2
PF3D7_0406900	N/A	conserved Plasmodium protein, unknown function
PF3D7_0407800	CINCH	protein CINCH
PF3D7_0409000	N/A	conserved Plasmodium protein, unknown function
PF3D7_0409900	ALP5b	actin-like protein, putative
PF3D7_0412500	N/A	Plasmodium RNA of unknown function RUF6
PF3D7_0412800	N/A	Plasmodium RNA of unknown function RUF6
PF3D7_0413000	N/A	Plasmodium RNA of unknown function RUF6
PF3D7_0414800	N/A	conserved Plasmodium protein, unknown function
PF3D7_0419400	N/A	conserved Plasmodium protein, unknown function
PF3D7_0505300	N/A	UDP-N-acetylglucosamine transporter, putative
PF3D7_0506900	ROM4	rhomboid protease ROM4
PF3D7_0507200	SUB3	subtilisin-like protease 3
PF3D7_0508000	P38	6-cysteine protein P38
PF3D7_0508100	SET9	SET domain protein, putative
PF3D7_0508400	N/A	CFA20 domain-containing protein, putative
PF3D7_0508900	AAP6	protein AAP6
PF3D7_0514000	TTL	tubulin--tyrosine ligase, putative
PF3D7_0515500	GEP1	gametogenesis essential protein 1, putative
PF3D7_0515700	GAP40	glideosome-associated protein 40, putative
PF3D7_0517200	N/A	WD repeat-containing protein, putative
PF3D7_0517500	N/A	UTP--glucose-1-phosphate uridylyltransferase, putative
PF3D7_0518200	MDM2	SWIB/MDM2 domain-containing protein
PF3D7_0518900	N/A	conserved protein, unknown function
PF3D7_0522600	N/A	magnesium transporter NIPA, putative
PF3D7_0528400	DHHC7	palmitoyltransferase DHHC7
PF3D7_0528900	N/A	conserved protein, unknown function
PF3D7_0530900	FRM1	formin 1
PF3D7_0531100	N/A	conserved Plasmodium protein, unknown function
PF3D7_0531600	N/A	18S ribosomal RNA
PF3D7_0531800	N/A	5.8S ribosomal RNA
PF3D7_0532000	N/A	28S ribosomal RNA
PF3D7_0603800	CEP76	NdP2 protein, putative
PF3D7_0604100	SIP2	AP2 domain transcription factor
PF3D7_0606400	N/A	conserved Plasmodium protein, unknown function
PF3D7_0607700	N/A	conserved Plasmodium protein, unknown function
PF3D7_0609600	N/A	conserved Plasmodium protein, unknown function
PF3D7_0611600	BTP1	basal complex transmembrane protein 1
PF3D7_0612200	LRR6	leucine-rich repeat protein
PF3D7_0612700	P12	6-cysteine protein P12
PF3D7_0613300	ROP14	rhoptry protein ROP14
PF3D7_0613800	ApiAP2	AP2 domain transcription factor, putative
PF3D7_0615500	CRK5	cdc2-related protein kinase 5
PF3D7_0616500	TLP	TRAP-like protein
PF3D7_0620400	MSP10	merozoite surface protein 10
PF3D7_0621400	ALV7	Pf77 protein
PF3D7_0622100	N/A	conserved Plasmodium protein, unknown function
PF3D7_0623400	Mei2	MEI2-like RNA-binding protein
PF3D7_0627200	PLC5	myosin light chain, putative
PF3D7_0630400	N/A	conserved Plasmodium protein, unknown function
PF3D7_0703800	N/A	conserved Plasmodium protein, unknown function
PF3D7_0704100	BTP2	basal complex transmembrane protein 2
PF3D7_0704500	N/A	serine/threonine protein kinase, putative
PF3D7_0705100	N/A	conserved Plasmodium protein, unknown function
PF3D7_0707300	RAMA	rhoptry-associated membrane antigen
PF3D7_0711600	N/A	Plasmodium RNA of unknown function RUF6
PF3D7_0711800	N/A	Plasmodium RNA of unknown function RUF6
PF3D7_0713800	NELFA	negative elongation factor A, putative
PF3D7_0715300	N/A	calcium/calmodulin-dependent protein kinase, putative
PF3D7_0722800	N/A	conserved protein, unknown function
PF3D7_0725600	N/A	18S ribosomal RNA
PF3D7_0725800	N/A	5.8S ribosomal RNA
PF3D7_0726000	N/A	28S ribosomal RNA
PF3D7_0800650	N/A	H/ACA snoRNA
PF3D7_0801100	N/A	28S ribosomal RNA
PF3D7_0801200	N/A	5.8S ribosomal RNA
PF3D7_0802700	N/A	conserved Plasmodium protein, unknown function
PF3D7_0802800	CNA	serine/threonine protein phosphatase 2B catalytic subunit A
PF3D7_0803200	N/A	filament assembling protein, putative
PF3D7_0806200	DPY19	Dpy-19-like C-mannosyltransferase
PF3D7_0806300	FLP	ferlin-like protein, putative
PF3D7_0809000	N/A	Plasmodium RNA of unknown function RUF6
PF3D7_0814400	N/A	phospholipase PLA1, putative
PF3D7_0815500	N/A	conserved Plasmodium protein, unknown function
PF3D7_0816200	VPS2	vacuolar protein sorting-associated protein 2, putative
PF3D7_0820600	N/A	conserved protein, unknown function
PF3D7_0823400	N/A	alpha/beta hydrolase, putative
PF3D7_0823600	LipB	lipoate-protein ligase B
PF3D7_0827400	N/A	conserved protein, unknown function
PF3D7_0828600	FT1	folate transporter 1
PF3D7_0828700	N/A	coiled-coil domain-containing protein 39, putative
PF3D7_0828900	N/A	conserved protein, unknown function
PF3D7_0829800	N/A	non-coding RNA
PF3D7_0829900	N/A	non-coding RNA
PF3D7_0830200	N/A	28S ribosomal RNA
PF3D7_0831600	CLAG8	cytoadherence linked asexual protein 8
PF3D7_0833400	RIF	rifin
PF3D7_0903800	CCp4	LCCL domain-containing protein
PF3D7_0905400	RhopH3	high molecular weight rhoptry protein 3
PF3D7_0911800	N/A	conserved Plasmodium protein, unknown function
PF3D7_0914400	KIC3	protein KIC3
PF3D7_0916300	N/A	conserved Plasmodium protein, unknown function
PF3D7_0917300	N/A	conserved protein, unknown function
PF3D7_0923300	PLP3	perforin-like protein 3
PF3D7_0924600	N/A	conserved Plasmodium protein, unknown function
PF3D7_0926400	N/A	monocarboxylate transporter, putative
PF3D7_0926600	N/A	conserved Plasmodium membrane protein, unknown function
PF3D7_0929400	RhopH2	high molecular weight rhoptry protein 2
PF3D7_0930000	N/A	procollagen lysine 5-dioxygenase, putative
PF3D7_0930300	MSP1	merozoite surface protein 1
PF3D7_0931700	N/A	PIH1 domain-containing protein, putative
PF3D7_0933100	N/A	conserved Plasmodium protein, unknown function
PF3D7_0934800	PKAc	cAMP-dependent protein kinase catalytic subunit
PF3D7_0934900	N/A	conserved Plasmodium protein, unknown function
PF3D7_0935800	CLAG9	cytoadherence linked asexual protein 9
PF3D7_1003000	N/A	guanylate cyclase organizer UGO, putative
PF3D7_1005200	N/A	conserved Plasmodium protein, unknown function
PF3D7_1007200	N/A	rho GTPase-activating protein, putative
PF3D7_1009700	N/A	tubulin--tyrosine ligase, putative
PF3D7_1018200	PPP8	serine/threonine protein phosphatase 8, putative
PF3D7_1019100	N/A	conserved Plasmodium protein, unknown function
PF3D7_1023800	N/A	conserved Plasmodium protein, unknown function
PF3D7_1024400	N/A	conserved Plasmodium protein, unknown function
PF3D7_1025900	N/A	conserved protein, unknown function
PF3D7_1026500	N/A	conserved Plasmodium protein, unknown function
PF3D7_1027300	nPrx	peroxiredoxin
PF3D7_1028900	IMC1m	inner membrane complex protein 1m, putative
PF3D7_1029900	N/A	ORC3 domain-containing protein, putative
PF3D7_1030800	N/A	calmodulin, putative
PF3D7_1031400	OTU	OTU-like cysteine protease
PF3D7_1031800	N/A	conserved protein, unknown function
PF3D7_1033900	N/A	ubiquitin-conjugating enzyme E2, putative
PF3D7_1034100	N/A	conserved protein, unknown function
PF3D7_1035100	N/A	probable protein, unknown function
PF3D7_1035200	N/A	S-antigen
PF3D7_1035700	DBLMSP	duffy binding-like merozoite surface protein
PF3D7_1036000	MSP11	merozoite surface protein 11
PF3D7_1037200	N/A	conserved Plasmodium protein, unknown function
PF3D7_1103500	N/A	CPW-WPC family protein
PF3D7_1107900	MSCS	mechanosensitive ion channel protein, putative
PF3D7_1109100	N/A	conserved Plasmodium protein, unknown function
PF3D7_1110700	ALP1	actin-like protein, putative
PF3D7_1111600	N/A	endonuclease/exonuclease/phosphatase family protein, putative
PF3D7_1111800	N/A	peptidyl-prolyl cis-trans isomerase, putative
PF3D7_1114800	G3PDH	glycerol-3-phosphate dehydrogenase, putative
PF3D7_1114900	N/A	filamin domain-containing protein, putative
PF3D7_1115100	N/A	conserved protein, unknown function
PF3D7_1116900	N/A	conserved protein, unknown function
PF3D7_1117200	N/A	conserved Plasmodium protein, unknown function
PF3D7_1121300	TKL2	tyrosine kinase-like protein
PF3D7_1121900	PDK1	3-phosphoinositide-dependent protein kinase 1
PF3D7_1122700	N/A	conserved Plasmodium protein, unknown function
PF3D7_1127700	N/A	conserved Plasmodium protein, unknown function
PF3D7_1128900	N/A	conserved protein, unknown function
PF3D7_1129300	N/A	conserved Plasmodium protein, unknown function
PF3D7_1131900	N/A	conserved Plasmodium protein, unknown function
PF3D7_1133300	CDC50B	cell division control protein CDC50B
PF3D7_1133400	AMA1	apical membrane antigen 1
PF3D7_1134900	N/A	conserved Plasmodium protein, unknown function
PF3D7_1136200	N/A	conserved Plasmodium protein, unknown function
PF3D7_1137000	N/A	U2 spliceosomal RNA
PF3D7_1138000	N/A	conserved Plasmodium protein, unknown function
PF3D7_1138400	GCalpha	guanylyl cyclase alpha
PF3D7_1140400	N/A	conserved Plasmodium protein, unknown function
PF3D7_1140600	N/A	conserved Plasmodium protein, unknown function
PF3D7_1141800	N/A	EELM2 domain-containing protein, putative
PF3D7_1143200	N/A	DnaJ protein, putative
PF3D7_1144400	N/A	conserved Plasmodium protein, unknown function
PF3D7_1145200	N/A	serine/threonine protein kinase, putative
PF3D7_1147000	SLARP	sporozoite and liver stage asparagine-rich protein
PF3D7_1148600	N/A	18S ribosomal RNA
PF3D7_1148640	N/A	28S ribosomal RNA
PF3D7_1213100	N/A	U1 spliceosomal RNA
PF3D7_1220000	N/A	female development protein FD4, putative
PF3D7_1227000	N/A	conserved Plasmodium protein, unknown function
PF3D7_1227300	N/A	conserved Plasmodium protein, unknown function
PF3D7_1230100	TLAP1	thioredoxin-like associated protein 1, putative
PF3D7_1232500	N/A	CG2-related protein, putative
PF3D7_1235200	VP2	V-type K+-independent H+-translocating inorganic pyrophosphatase
PF3D7_1236600	N/A	p25-alpha family protein, putative
PF3D7_1238000	N/A	COPI associated protein, putative
PF3D7_1243300	N/A	conserved Plasmodium protein, unknown function
PF3D7_1243900	DOC2	double C2-like domain-containing protein
PF3D7_1244300	N/A	ACEA small nucleolar RNA U3
PF3D7_1252100	RON3	rhoptry neck protein 3
PF3D7_1254100	N/A	stevor
PF3D7_1306000	N/A	conserved Plasmodium protein, unknown function
PF3D7_1307900	N/A	tripartite motif protein, putative
PF3D7_1308000	N/A	conserved Plasmodium membrane protein, unknown function
PF3D7_1312000	MCAT	malonyl CoA-acyl carrier protein transacylase
PF3D7_1313600	N/A	Clu domain-containing protein, putative
PF3D7_1315300	N/A	conserved protein, unknown function
PF3D7_1316700	N/A	conserved protein, unknown function
PF3D7_1318700	AAP4	protein AAP4
PF3D7_1322600	N/A	conserved Plasmodium protein, unknown function
PF3D7_1323000	FabZ	beta-hydroxyacyl-ACP dehydratase
PF3D7_1328800	SIR2A	transcriptional regulatory protein sir2a
PF3D7_1331400	N/A	CPW-WPC family protein
PF3D7_1334600	MSRP3	MSP7-like protein
PF3D7_1334800	MSRP2	MSP7-like protein
PF3D7_1334900	N/A	MSP7-like protein, fragment, pseudogene
PF3D7_1335100	MSP7	merozoite surface protein 7
PF3D7_1335900	TRAP	thrombospondin-related anonymous protein
PF3D7_1341100	N/A	U6 spliceosomal RNA
PF3D7_1347600	N/A	conserved protein, unknown function
PF3D7_1348600	N/A	conserved Plasmodium protein, unknown function
PF3D7_1358600	N/A	zinc finger protein, putative
PF3D7_1361800	GAC	glideosome-associated connector
PF3D7_1362100	14-3-3II	14-3-3 protein
PF3D7_1364100	P92	6-cysteine protein P92
PF3D7_1366100	DIP13	DIP13 homolog, putative
PF3D7_1367800	PSOP2	secreted ookinete protein, putative
PF3D7_1368000	N/A	conserved protein, unknown function
PF3D7_1371000	N/A	18S ribosomal RNA
PF3D7_1371300	N/A	28S ribosomal RNA
PF3D7_1401700	N/A	conserved Plasmodium protein, unknown function
PF3D7_1410400	RAP1	rhoptry-associated protein 1
PF3D7_1410800	N/A	ankyrin-repeat protein, putative
PF3D7_1413600	N/A	conserved Plasmodium protein, unknown function
PF3D7_1417300	ATG4	cysteine protease ATG4, putative
PF3D7_1418500	N/A	5S ribosomal RNA
PF3D7_1418600	N/A	5S ribosomal RNA
PF3D7_1418700	N/A	5S ribosomal RNA
PF3D7_1418800	N/A	signal recognition particle RNA
PF3D7_1426300	N/A	dynein intermediate chain, putative
PF3D7_1427200	SEL4	selenoprotein 4, putative
PF3D7_1430200	PMIX	plasmepsin IX
PF3D7_1430500	N/A	conserved Plasmodium protein, unknown function
PF3D7_1432200	N/A	conserved Plasmodium protein, unknown function
PF3D7_1434900	N/A	conserved Plasmodium protein, unknown function
PF3D7_1440400	N/A	zinc finger protein, putative
PF3D7_1441300	N/A	serine/threonine protein kinase, putative
PF3D7_1447500	IMC20	inner membrane complex protein, putative
PF3D7_1449200	N/A	conserved Plasmodium protein, unknown function
PF3D7_1449600	N/A	conserved protein, unknown function
PF3D7_1451700	CNB	calcineurin subunit B
PF3D7_1452800	N/A	conserved Plasmodium protein, unknown function
PF3D7_1453200	N/A	conserved Plasmodium protein, unknown function
PF3D7_1455600	FER2	ferlin, putative
PF3D7_1455800	CCp2	LCCL domain-containing protein
PF3D7_1463900	RON11	rhoptry neck protein 11, putative
PF3D7_1469900	MGET	protein MGET
PF3D7_1475800	N/A	conserved Plasmodium protein, unknown function
PF3D7_1476300	N/A	Plasmodium exported protein (PHISTb), unknown function
PF3D7_API04900	N/A	large subunit ribosomal RNA
PF3D7_API05700	N/A	small subunit ribosomal RNA
PF3D7_API05900	N/A	small subunit ribosomal RNA
PF3D7_API06700	N/A	large subunit ribosomal RNA

## Sheet: S stage_down-regulated genes
Gene ID	Gene Name	Product Description
PF3D7_0100100	VAR	erythrocyte membrane protein 1, PfEMP1
PF3D7_0102200	RESA	ring-infected erythrocyte surface antigen
PF3D7_0102500	EBA181	erythrocyte binding antigen-181
PF3D7_0102700	MaTrA	merozoite-associated tryptophan-rich antigen
PF3D7_0104200	N/A	StAR-related lipid transfer protein
PF3D7_0105300	CAP	cyclase-associated protein
PF3D7_0105400	N/A	conserved Plasmodium protein, unknown function
PF3D7_0106600	N/A	conserved Plasmodium protein, unknown function
PF3D7_0108500	N/A	ELM2 domain-containing protein, putative
PF3D7_0108900	N/A	non-coding RNA
PF3D7_0109000	PHIL1	photosensitized INA-labeled protein PHIL1
PF3D7_0109100	CCp5	LCCL domain-containing protein
PF3D7_0112900	N/A	Plasmodium exported protein, unknown function
PF3D7_0113600	SURF1.2	surface-associated interspersed protein 1.2 (SURFIN 1.2), pseudogene
PF3D7_0115700	VAR	erythrocyte membrane protein 1, PfEMP1
PF3D7_0200100	VAR	erythrocyte membrane protein 1, PfEMP1
PF3D7_0201700	N/A	DnaJ protein, putative
PF3D7_0202100	LSAP2	liver stage associated protein 2
PF3D7_0202200	PTP1	EMP1-trafficking protein
PF3D7_0202500	ETRAMP2	early transcribed membrane protein 2
PF3D7_0203100	N/A	protein kinase, putative
PF3D7_0206200	PAT	pantothenate transporter
PF3D7_0206800	MSP2	merozoite surface protein 2
PF3D7_0206900	MSP5	merozoite surface protein 5
PF3D7_0207000	MSP4	merozoite surface protein 4
PF3D7_0207200	ISCA1	iron-sulfur assembly protein, putative
PF3D7_0207300	SERA8	serine repeat antigen 8
PF3D7_0209500	N/A	conserved Plasmodium protein, unknown function
PF3D7_0210600	CERLI1	protein CERLI1
PF3D7_0211600	ALG14	UDP-N-acetylglucosamine transferase subunit ALG14, putative
PF3D7_0212600	SPATR	secreted protein with altered thrombospondin repeat domain
PF3D7_0214600	STK2	serine/threonine protein kinase STK2, putative
PF3D7_0214700	N/A	conserved Plasmodium protein, unknown function
PF3D7_0214900	RON6	rhoptry neck protein 6
PF3D7_0215300	ACS8	acyl-CoA synthetase
PF3D7_0217500	CDPK1	calcium-dependent protein kinase 1
PF3D7_0219700	GEXP20	Plasmodium exported protein (PHISTc), unknown function
PF3D7_0219900	N/A	Plasmodium exported protein, unknown function
PF3D7_0220400	N/A	DnaJ protein, putative, pseudogene
PF3D7_0220500	N/A	Plasmodium exported protein (hyp2), unknown function
PF3D7_0220800	CLAG2	cytoadherence linked asexual protein 2
PF3D7_0221700	N/A	Plasmodium exported protein, unknown function
PF3D7_0301800	N/A	Plasmodium exported protein, unknown function
PF3D7_0302200	CLAG3.2	cytoadherence linked asexual protein 3.2
PF3D7_0302500	CLAG3.1	cytoadherence linked asexual protein 3.1
PF3D7_0304000	IMC1a	inner membrane complex protein 1a, putative
PF3D7_0304100	IMC1e	inner membrane complex protein 1e, putative
PF3D7_0305200	N/A	GRIP domain-containing protein, putative
PF3D7_0307300	EB1	end-binding protein 1
PF3D7_0308300	PIC4	PhIL1-interacting candidate PIC4
PF3D7_0308700	N/A	conserved protein, unknown function
PF3D7_0311400	PKRP	kinase-related protein PKRP, putative
PF3D7_0314100	N/A	vesicle transport v-SNARE protein, putative
PF3D7_0315200	CTRP	circumsporozoite- and TRAP-related protein
PF3D7_0316000	MA	microneme associated antigen
PF3D7_0318500	N/A	conserved Plasmodium protein, unknown function
PF3D7_0318700	N/A	conserved Plasmodium protein, unknown function
PF3D7_0318800	N/A	triosephosphate isomerase, putative
PF3D7_0321400	pPK1	pseudo protein kinase 1, putative
PF3D7_0323400	RIPR	Rh5 interacting protein
PF3D7_0324900	VAR	erythrocyte membrane protein 1, PfEMP1
PF3D7_0401800	PfD80	Plasmodium exported protein (PHISTb), unknown function
PF3D7_0402100	N/A	Plasmodium exported protein (PHISTb), unknown function
PF3D7_0402200	SURF4.1	surface-associated interspersed protein 4.1 (SURFIN 4.1), pseudogene
PF3D7_0402300	RH1	reticulocyte binding protein homologue 1
PF3D7_0402900	N/A	probable protein, unknown function
PF3D7_0403800	N/A	alpha/beta hydrolase, putative
PF3D7_0404000	N/A	conserved Plasmodium protein, unknown function
PF3D7_0404100	ApiAP2	AP2 domain transcription factor AP2-SP2, putative
PF3D7_0404700	DPAP3	dipeptidyl aminopeptidase 3
PF3D7_0404800	N/A	sporozoite-specific protein S10, putative
PF3D7_0405200	CERLI2	protein CERLI2
PF3D7_0405300	LISP2	liver specific protein 2, putative
PF3D7_0405900	ASP	apical sushi protein
PF3D7_0407700	N/A	TH1 domain-containing protein, putative
PF3D7_0407900	N/A	AAA family ATPase, putative
PF3D7_0408000	N/A	conserved Plasmodium protein, unknown function
PF3D7_0409900	ALP5b	actin-like protein, putative
PF3D7_0410000	EVP1	erythrocyte vesicle protein 1
PF3D7_0410500	N/A	conserved Plasmodium protein, unknown function
PF3D7_0412900	VAR	erythrocyte membrane protein 1, PfEMP1
PF3D7_0413100	VAR	erythrocyte membrane protein 1, PfEMP1
PF3D7_0414500	N/A	male development protein MD5, putative
PF3D7_0414800	N/A	conserved Plasmodium protein, unknown function
PF3D7_0414900	ARO	armadillo-domain containing rhoptry protein
PF3D7_0415800	N/A	PhIL1-interacting candidate PIC3
PF3D7_0417000	N/A	conserved Plasmodium protein, unknown function
PF3D7_0418600	N/A	regulator of chromosome condensation, putative
PF3D7_0419700	Pf34	apical merozoite protein
PF3D7_0420300	ApiAP2	AP2 domain transcription factor, putative
PF3D7_0423300	N/A	conserved Plasmodium protein, unknown function
PF3D7_0423400	AARP	apical asparagine-rich protein AARP
PF3D7_0423500	GAPM2	glideosome associated protein with multiple membrane spans 2
PF3D7_0423800	CyRPA	cysteine-rich protective antigen
PF3D7_0423900	N/A	probable protein, unknown function
PF3D7_0424100	RH5	reticulocyte binding protein homologue 5
PF3D7_0424200	RH4	reticulocyte binding protein homologue 4
PF3D7_0424300	EBA165	erythrocyte binding antigen-165, pseudogene
PF3D7_0424400	SURF4.2	surface-associated interspersed protein 4.2 (SURFIN 4.2)
PF3D7_0424500	FIKK4.1	serine/threonine protein kinase, FIKK family
PF3D7_0424600	N/A	Plasmodium exported protein (PHISTb)
PF3D7_0424800	N/A	Plasmodium exported protein (PHISTb), unknown function
PF3D7_0424900	N/A	Plasmodium exported protein (PHISTa), unknown function
PF3D7_0425100	N/A	Plasmodium exported protein (hyp6), unknown function
PF3D7_0425900	RIF	rifin
PF3D7_0500600	N/A	stevor, pseudogene
PF3D7_0500900	FIKK5	serine/threonine protein kinase, FIKK family
PF3D7_0501100	HSP40	co-chaperone J domain protein JDP
PF3D7_0501300	SBP1	skeleton-binding protein 1
PF3D7_0501400	FIRA	interspersed repeat antigen
PF3D7_0501500	RAP3	rhoptry-associated protein 3
PF3D7_0501600	RAP2	rhoptry-associated protein 2
PF3D7_0502400	MSP8	merozoite surface protein 8
PF3D7_0503600	MyoB	myosin B
PF3D7_0504100	N/A	AN1-type zinc finger protein, putative
PF3D7_0507300	SOPT	subtilisin-like ookinete protein SOPT
PF3D7_0507400	SUB1-ProM	subtilisin propeptide-like protein
PF3D7_0507500	SUB1	subtilisin-like protease 1
PF3D7_0508400	N/A	CFA20 domain-containing protein, putative
PF3D7_0511600	ARNP	apical rhoptry neck protein
PF3D7_0515400	N/A	conserved protein, unknown function
PF3D7_0515700	GAP40	glideosome-associated protein 40, putative
PF3D7_0516500	MFS1	major facilitator superfamily domain-containing protein, putative
PF3D7_0517600	CPbeta	F-actin-capping protein subunit beta, putative
PF3D7_0518900	N/A	conserved protein, unknown function
PF3D7_0522600	N/A	magnesium transporter NIPA, putative
PF3D7_0524800	UFD1	ubiquitin fusion degradation protein 1, putative
PF3D7_0525300	N/A	conserved protein, unknown function
PF3D7_0525800	IMC1g	inner membrane complex protein 1g, putative
PF3D7_0525900	NEK2	NIMA related kinase 2
PF3D7_0527800	N/A	tRNA Leucine
PF3D7_0528300	N/A	conserved protein, unknown function
PF3D7_0528400	DHHC7	palmitoyltransferase DHHC7
PF3D7_0528900	N/A	conserved protein, unknown function
PF3D7_0605600	N/A	nucleoside diphosphate kinase, putative
PF3D7_0605700	N/A	conserved Plasmodium protein, unknown function
PF3D7_0605900	N/A	elongation of fatty acids protein, putative
PF3D7_0606200	PEX4	ubiquitin-conjugating enzyme E2 PEX4, putative
PF3D7_0609700	KIC6	protein KIC6
PF3D7_0609800	DHHC2	palmitoyltransferase DHHC2, putative
PF3D7_0612700	P12	6-cysteine protein P12
PF3D7_0613300	ROP14	rhoptry protein ROP14
PF3D7_0613600	N/A	conserved Plasmodium protein, unknown function
PF3D7_0613900	MyoE	myosin E, putative
PF3D7_0614600	N/A	conserved Plasmodium protein, unknown function
PF3D7_0614700	N/A	F-box protein FBXO6, putative
PF3D7_0617400	VAR	erythrocyte membrane protein 1, PfEMP1
PF3D7_0618000	N/A	conserved Plasmodium membrane protein, unknown function
PF3D7_0620400	MSP10	merozoite surface protein 10
PF3D7_0620600	N/A	conserved Plasmodium protein, unknown function
PF3D7_0621100	N/A	tetratricopeptide repeat protein, putative
PF3D7_0621400	ALV7	Pf77 protein
PF3D7_0623800	TKL4	tyrosine kinase-like protein, putative
PF3D7_0625000	SMS1	sphingomyelin synthase 1, putative
PF3D7_0625400	N/A	conserved Plasmodium protein, unknown function
PF3D7_0628100	HECT1	HECT domain-containing protein 1, putative
PF3D7_0628300	CEPT	choline/ethanolaminephosphotransferase, putative
PF3D7_0628400	N/A	protease, putative
PF3D7_0629300	PL	phospholipase, putative
PF3D7_0701900	N/A	Plasmodium exported protein, unknown function
PF3D7_0702000	N/A	Plasmodium exported protein (hyp12), unknown function
PF3D7_0702100	N/A	Plasmodium exported protein (PHISTb), unknown function, pseudogene
PF3D7_0702200	LPL20	lysophospholipase LPL20
PF3D7_0702300	STARP	sporozoite threonine and asparagine-rich protein
PF3D7_0702600	N/A	chitinase, fragment
PF3D7_0706300	AKIT11	apicomplexan kinetochore protein 11, putative
PF3D7_0707300	RAMA	rhoptry-associated membrane antigen
PF3D7_0709800	N/A	protein BRAWNIN, putative
PF3D7_0711700	VAR	erythrocyte membrane protein 1, PfEMP1
PF3D7_0712300	VAR	erythrocyte membrane protein 1, PfEMP1
PF3D7_0713800	NELFA	negative elongation factor A, putative
PF3D7_0715100	MYCBP	C-Myc-binding protein, putative
PF3D7_0718300	CRMP2	cysteine repeat modular protein 2
PF3D7_0720300	N/A	conserved Plasmodium protein, unknown function
PF3D7_0722200	RALP1	rhoptry-associated leucine zipper-like protein 1
PF3D7_0722800	N/A	conserved protein, unknown function
PF3D7_0723200	N/A	conserved Plasmodium protein, unknown function
PF3D7_0723300	N/A	conserved protein, unknown function
PF3D7_0724900	N/A	kinesin-20, putative
PF3D7_0725400	N/A	conserved Plasmodium protein, unknown function
PF3D7_0726100	N/A	Plasmodium exported protein, unknown function
PF3D7_0729700	N/A	zinc finger protein, putative
PF3D7_0730400	IMP2	IMP1-like protein, putative
PF3D7_0730800	N/A	Plasmodium exported protein, unknown function
PF3D7_0731000	N/A	non-coding RNA
PF3D7_0731500	EBA175	erythrocyte binding antigen-175
PF3D7_0731800	GEXP08	alpha/beta hydrolase, putative
PF3D7_0800200	VAR	erythrocyte membrane protein 1, PfEMP1
PF3D7_0800300	VAR	erythrocyte membrane protein 1, PfEMP1
PF3D7_0800800	N/A	Plasmodium exported protein (hyp7), unknown function
PF3D7_0801300	WARP	von Willebrand factor A domain-related protein
PF3D7_0801400	N/A	conserved Plasmodium protein, unknown function
PF3D7_0802600	ACbeta	adenylyl cyclase beta
PF3D7_0803500	N/A	AAA family ATPase, putative
PF3D7_0804200	N/A	Plasmodium RNA of unknown function RUF3
PF3D7_0805200	GAMER	gamete release protein, putative
PF3D7_0805300	N/A	zinc finger protein, putative
PF3D7_0808200	PMX	plasmepsin X
PF3D7_0808700	VAR	erythrocyte membrane protein 1, PfEMP1
PF3D7_0809100	VAR	erythrocyte membrane protein 1, PfEMP1
PF3D7_0810300	PPM5	protein phosphatase PPM5, putative
PF3D7_0810900	N/A	conserved Plasmodium protein, unknown function
PF3D7_0812300	SSP3	sporozoite surface protein 3, putative
PF3D7_0813100	N/A	conserved Plasmodium protein, unknown function
PF3D7_0813800	GMD	GDP-mannose 4,6-dehydratase
PF3D7_0814500	N/A	conserved protein, unknown function
PF3D7_0814600	SIMP	structural integrity maintenance protein SIMP, putative
PF3D7_0814700	N/A	conserved Plasmodium protein, unknown function
PF3D7_0817600	N/A	conserved protein, unknown function
PF3D7_0817700	RON5	rhoptry neck protein 5
PF3D7_0818100	CZIF2	C3H1-type zinc finger protein CZIF2
PF3D7_0818300	N/A	dynactin subunit 6, putative
PF3D7_0818500	N/A	zinc finger protein, putative
PF3D7_0819600	N/A	ubiquitin-like protein, putative
PF3D7_0822500	DLC1	dynein light chain 1
PF3D7_0822900	PIC2	PhIL1-interacting candidate PIC2
PF3D7_0828600	FT1	folate transporter 1
PF3D7_0828800	GAMA	GPI-anchored micronemal antigen
PF3D7_0830500	TryThrA	sporozoite and liver stage tryptophan-rich protein, putative
PF3D7_0830600	N/A	Plasmodium exported protein (PHISTc), unknown function
PF3D7_0831600	CLAG8	cytoadherence linked asexual protein 8
PF3D7_0833500	VAR	erythrocyte membrane protein 1, PfEMP1
PF3D7_0900100	VAR	erythrocyte membrane protein 1, PfEMP1
PF3D7_0902100	FIKK9.2	serine/threonine protein kinase, FIKK family
PF3D7_0902300	FIKK9.4	serine/threonine protein kinase, FIKK family
PF3D7_0902500	FIKK9.6	serine/threonine protein kinase, FIKK family
PF3D7_0903600	N/A	conserved protein, unknown function
PF3D7_0905300	N/A	dynein heavy chain, putative
PF3D7_0905400	RhopH3	high molecular weight rhoptry protein 3
PF3D7_0905600	WDR66	WD repeat-containing protein 66, putative
PF3D7_0907500	N/A	conserved protein, unknown function
PF3D7_0908500	N/A	conserved Plasmodium protein, unknown function
PF3D7_0909200	POFUT2	GDP-fucose protein O-fucosyltransferase 2
PF3D7_0910600	YKT6.1	SNARE protein
PF3D7_0911100	N/A	START domain-containing protein, putative
PF3D7_0913800	N/A	conserved Plasmodium protein, unknown function
PF3D7_0914100	N/A	conserved Plasmodium protein, unknown function
PF3D7_0914200	N/A	phospholipid or glycerol acyltransferase, putative
PF3D7_0914400	KIC3	protein KIC3
PF3D7_0916000	MFS2	major facilitator superfamily domain-containing protein, putative
PF3D7_0917300	N/A	conserved protein, unknown function
PF3D7_0917400	N/A	conserved Plasmodium protein, unknown function
PF3D7_0918700	N/A	conserved Plasmodium protein, unknown function
PF3D7_0919200	N/A	PPPDE peptidase, putative
PF3D7_0919300	TrxL1	thioredoxin-like protein 1, putative
PF3D7_0919500	MFS3	major facilitator superfamily domain-containing protein, putative
PF3D7_0920500	N/A	ADP-ribosylation factor, putative
PF3D7_0920700	N/A	CRAL/TRIO domain-containing protein, putative
PF3D7_0924000	N/A	patatin-like phospholipase, putative
PF3D7_0927200	N/A	gametocyte development protein GD1, putative
PF3D7_0927500	N/A	dynein light chain, putative
PF3D7_0929600	N/A	G2 protein, putative
PF3D7_0930200	LRR8	leucine-rich repeat protein
PF3D7_0931900	AKLP2	adenylate kinase-like protein 2
PF3D7_0932000	N/A	conserved Plasmodium protein, unknown function
PF3D7_0932200	PFN	profilin
PF3D7_0934600	N/A	conserved Plasmodium protein, unknown function
PF3D7_0934800	PKAc	cAMP-dependent protein kinase catalytic subunit
PF3D7_0935600	GIG	gametocytogenesis-implicated protein
PF3D7_0935700	N/A	Plasmodium exported protein, unknown function
PF3D7_0935900	REX1	ring-exported protein 1
PF3D7_0936000	REX2	ring-exported protein 2
PF3D7_0936300	REX3	ring-exported protein 3
PF3D7_1001100	ACBP1	acyl-CoA binding protein, isoform 1, ACBP1
PF3D7_1001400	XL1	exported lipase 1
PF3D7_1001500	ETRAMP10	early transcribed membrane protein 10.1
PF3D7_1002000	N/A	Plasmodium exported protein (hyp2), unknown function
PF3D7_1002100	PTP5	EMP1-trafficking protein
PF3D7_1003400	N/A	conserved Plasmodium protein, unknown function
PF3D7_1003600	IMC1c	inner membrane complex protein 1c, putative
PF3D7_1005200	N/A	conserved Plasmodium protein, unknown function
PF3D7_1005800	N/A	conserved Plasmodium membrane protein, unknown function
PF3D7_1006000	IMP4	IMP1-like protein, putative
PF3D7_1007300	N/A	RING zinc finger protein, putative
PF3D7_1007400	N/A	conserved protein, unknown function
PF3D7_1009700	N/A	tubulin--tyrosine ligase, putative
PF3D7_1010300	SDH4	succinate dehydrogenase subunit 4, putative
PF3D7_1010400	N/A	MORN repeat protein, putative
PF3D7_1010500	N/A	ankyrin-repeat protein, putative
PF3D7_1012200	RA	rhoptry associated adhesin
PF3D7_1013800	N/A	conserved Plasmodium protein, unknown function
PF3D7_1014100	MSA180	merozoite surface protein MSA180
PF3D7_1014200	HAP2	male gamete fusion factor HAP2
PF3D7_1014900	KIC8	protein KIC8
PF3D7_1016000	N/A	conserved Plasmodium protein, unknown function
PF3D7_1016700	N/A	Plasmodium exported protein (PHISTc), unknown function
PF3D7_1016800	N/A	Plasmodium exported protein (PHISTc), unknown function
PF3D7_1017100	RON12	rhoptry neck protein 12
PF3D7_1017500	ELC	myosin essential light chain ELC
PF3D7_1019100	N/A	conserved Plasmodium protein, unknown function
PF3D7_1019200	N/A	conserved Plasmodium protein, unknown function
PF3D7_1019900	ATG8	autophagy-related protein 8
PF3D7_1020100	N/A	flagellar outer arm dynein-associated protein, putative
PF3D7_1020300	N/A	cytoplasmic dynein intermediate chain, putative
PF3D7_1021700	N/A	VPS13 domain-containing protein, putative
PF3D7_1022700	PLSCR	phospholipid scramblase
PF3D7_1023000	N/A	conserved Plasmodium protein, unknown function
PF3D7_1025000	EPS15	Eps15-like protein
PF3D7_1025400	N/A	conserved Plasmodium membrane protein, unknown function
PF3D7_1026600	N/A	conserved Plasmodium protein, unknown function
PF3D7_1027300	nPrx	peroxiredoxin
PF3D7_1028700	MTRAP	merozoite TRAP-like protein
PF3D7_1028900	IMC1m	inner membrane complex protein 1m, putative
PF3D7_1030200	CLAMP	claudin-like apicomplexan microneme protein, putative
PF3D7_1030400	N/A	conserved protein, unknown function
PF3D7_1030800	N/A	calmodulin, putative
PF3D7_1031000	P25	ookinete surface protein P25
PF3D7_1031200	MORN1	MORN repeat-containing protein 1
PF3D7_1031400	OTU	OTU-like cysteine protease
PF3D7_1035100	N/A	probable protein, unknown function
PF3D7_1035200	N/A	S-antigen
PF3D7_1035300	GLURP	glutamate-rich protein GLURP
PF3D7_1035400	MSP3	merozoite surface protein 3
PF3D7_1035500	MSP6	merozoite surface protein 6
PF3D7_1035600	H101	merozoite surface protein
PF3D7_1035700	DBLMSP	duffy binding-like merozoite surface protein
PF3D7_1035900	MAAP	merozoites-associated armadillo repeats protein
PF3D7_1036000	MSP11	merozoite surface protein 11
PF3D7_1036300	DBLMSP2	duffy binding-like merozoite surface protein 2
PF3D7_1036400	LSA1	liver stage antigen 1
PF3D7_1036500	N/A	conserved Plasmodium protein, unknown function
PF3D7_1037500	DYN2	dynamin-like protein
PF3D7_1100200	VAR	erythrocyte membrane protein 1, PfEMP1
PF3D7_1102700	ETRAMP11.1	early transcribed membrane protein 11.1
PF3D7_1102800	ETRAMP11.2	early transcribed membrane protein 11.2
PF3D7_1104900	N/A	calcium/calmodulin-dependent protein kinase, putative
PF3D7_1105000	H4	histone H4
PF3D7_1105100	H2B	histone H2B
PF3D7_1105600	PTEX88	translocon component PTEX88
PF3D7_1107800	ApiAP2	AP2 domain transcription factor, putative
PF3D7_1108100	N/A	conserved Plasmodium protein, unknown function
PF3D7_1109100	N/A	conserved Plasmodium protein, unknown function
PF3D7_1112900	N/A	conserved protein, unknown function
PF3D7_1114800	G3PDH	glycerol-3-phosphate dehydrogenase, putative
PF3D7_1115800	N/A	conserved Plasmodium protein, unknown function
PF3D7_1115900	DHHC9	palmitoyltransferase DHHC9
PF3D7_1116000	RON4	rhoptry neck protein 4
PF3D7_1116800	HSP101	heat shock protein 101
PF3D7_1116900	N/A	conserved protein, unknown function
PF3D7_1117400	N/A	conserved Plasmodium protein, unknown function
PF3D7_1118700	MLC-B	myosin light chain B
PF3D7_1119700	N/A	conserved Plasmodium protein, unknown function
PF3D7_1125700	N/A	kelch domain-containing protein, putative
PF3D7_1125800	N/A	kelch domain-containing protein, putative
PF3D7_1126700	ATG23	conserved Plasmodium protein, unknown function
PF3D7_1127600	N/A	CRAL/TRIO domain-containing protein, putative
PF3D7_1127900	N/A	conserved Plasmodium protein, unknown function
PF3D7_1128900	N/A	conserved protein, unknown function
PF3D7_1131500	N/A	conserved Plasmodium protein, unknown function
PF3D7_1131700	N/A	conserved Plasmodium protein, unknown function
PF3D7_1133400	AMA1	apical membrane antigen 1
PF3D7_1135100	PPM8	protein phosphatase PPM8, putative
PF3D7_1136200	N/A	conserved Plasmodium protein, unknown function
PF3D7_1136700	AIP	armadillo-interacting protein AIP
PF3D7_1136900	SUB2	subtilisin-like protease 2
PF3D7_1137200	AEP	apical exonemal protein
PF3D7_1137800	SPELD	sporozoite surface protein essential for liver stage development, putative
PF3D7_1140000	CA	carbonic anhydrase
PF3D7_1140400	N/A	conserved Plasmodium protein, unknown function
PF3D7_1143100	AP2-O	AP2 domain transcription factor AP2-O
PF3D7_1145200	N/A	serine/threonine protein kinase, putative
PF3D7_1146200	N/A	conserved Plasmodium protein, unknown function
PF3D7_1147200	N/A	tubulin--tyrosine ligase, putative
PF3D7_1148900	N/A	Plasmodium exported protein, unknown function
PF3D7_1149200	RESA3	ring-infected erythrocyte surface antigen
PF3D7_1149600	N/A	DnaJ protein, putative
PF3D7_1150400	VAR	erythrocyte membrane protein 1, PfEMP1
PF3D7_1200400	VAR	erythrocyte membrane protein 1, PfEMP1
PF3D7_1200600	VAR2CSA	erythrocyte membrane protein 1, PfEMP1
PF3D7_1200700	ACS7	acyl-CoA synthetase
PF3D7_1201200	N/A	Plasmodium exported protein (PHISTa-like), unknown function
PF3D7_1203800	N/A	non-coding RNA
PF3D7_1204900	N/A	conserved Plasmodium protein, unknown function
PF3D7_1206000	SHLP2	shewanella-like protein phosphatase 2
PF3D7_1206100	ISN1	IMP-specific 5'-nucleotidase 1
PF3D7_1206300	N/A	conserved Plasmodium protein, unknown function
PF3D7_1209400	CIA1	cytosolic iron-sulfur protein assembly protein 1, putative
PF3D7_1209600	PBGD	porphobilinogen deaminase
PF3D7_1210200	N/A	zinc finger protein, putative
PF3D7_1216600	CelTOS	cell traversal protein for ookinetes and sporozoites
PF3D7_1217400	N/A	conserved protein, unknown function
PF3D7_1218000	TRAMP	thrombospondin-related apical membrane protein
PF3D7_1218100	N/A	conserved Plasmodium protein, unknown function
PF3D7_1221400	IMC1h	inner membrane complex protein 1h, putative
PF3D7_1221900	N/A	conserved Plasmodium membrane protein, unknown function
PF3D7_1222600	AP2-G	AP2 domain transcription factor AP2-G
PF3D7_1222700	GAP45	glideosome-associated protein 45
PF3D7_1223000	N/A	conserved Plasmodium protein, unknown function
PF3D7_1223100	PKAr	cAMP-dependent protein kinase regulatory subunit
PF3D7_1224200	N/A	BRO1 domain-containing protein, putative
PF3D7_1227700	KIC2	protein KIC2
PF3D7_1228600	MSP9	merozoite surface protein 9
PF3D7_1229200	N/A	non-coding RNA
PF3D7_1229800	MyoJ	myosin J, putative
PF3D7_1230100	TLAP1	thioredoxin-like associated protein 1, putative
PF3D7_1230300	SPM2	subpellicular microtubule protein 2, putative
PF3D7_1231200	N/A	conserved Plasmodium protein, unknown function
PF3D7_1231300	N/A	conserved Plasmodium protein, unknown function
PF3D7_1231400	ICM1	membrane protein ICM1
PF3D7_1232500	N/A	CG2-related protein, putative
PF3D7_1235000	PIH1	PIH1 domain-containing protein, putative
PF3D7_1235200	VP2	V-type K+-independent H+-translocating inorganic pyrophosphatase
PF3D7_1236900	N/A	conserved Plasmodium protein, unknown function
PF3D7_1237900	N/A	conserved Plasmodium protein, unknown function
PF3D7_1238900	PK2	protein kinase 2
PF3D7_1240100	ETRAMP12	early transcribed membrane protein 12
PF3D7_1243300	N/A	conserved Plasmodium protein, unknown function
PF3D7_1243400	N/A	conserved Plasmodium protein, unknown function
PF3D7_1243700	N/A	ubiquitin-conjugating enzyme E2, putative
PF3D7_1243900	DOC2	double C2-like domain-containing protein
PF3D7_1244500	PIMMS57	PIMMS57 protein
PF3D7_1246200	ACT1	actin I
PF3D7_1246400	MTIP	myosin A-tail interacting protein
PF3D7_1247700	N/A	conserved Plasmodium protein, unknown function
PF3D7_1247800	DPAP2	dipeptidyl aminopeptidase 2
PF3D7_1249700	N/A	conserved Plasmodium protein, unknown function
PF3D7_1250200	N/A	CSC1-like protein, putative
PF3D7_1251200	N/A	coronin
PF3D7_1252100	RON3	rhoptry neck protein 3
PF3D7_1252200	CHT1	chitinase
PF3D7_1252400	RH3	reticulocyte binding protein homologue 3, pseudogene
PF3D7_1252900	N/A	Plasmodium exported protein, unknown function
PF3D7_1301600	EBA140	erythrocyte binding antigen-140
PF3D7_1301800	SURF13.1	surface-associated interspersed protein 13.1 (SURFIN 13.1), pseudogene
PF3D7_1302200	UIS3	protein UIS3
PF3D7_1304200	MIT2	CorA-like Mg2+ transporter protein, putative
PF3D7_1307400	N/A	conserved Plasmodium protein, unknown function
PF3D7_1307500	N/A	conserved Plasmodium protein, unknown function
PF3D7_1308000	N/A	conserved Plasmodium membrane protein, unknown function
PF3D7_1310200	N/A	conserved Plasmodium protein, unknown function
PF3D7_1310600	RAB5b	ras-related protein Rab-5B
PF3D7_1310700	PIC5	PhIL1-interacting candidate PIC5
PF3D7_1312500	N/A	conserved Plasmodium protein, unknown function
PF3D7_1316200	N/A	ADP-ribosylation factor, putative
PF3D7_1316700	N/A	conserved protein, unknown function
PF3D7_1318000	N/A	conserved protein, unknown function
PF3D7_1318700	AAP4	protein AAP4
PF3D7_1318900	N/A	conserved Plasmodium protein, unknown function
PF3D7_1321900	N/A	conserved protein, unknown function
PF3D7_1323700	GAPM1	glideosome associated protein with multiple membrane spans 1
PF3D7_1327300	SPM3	subpellicular microtubule protein 3
PF3D7_1327600	NMNAT	nicotinamide/nicotinic acid mononucleotide adenylyltransferase
PF3D7_1328800	SIR2A	transcriptional regulatory protein sir2a
PF3D7_1329700	ACBP1	apicoplast calcium binding protein 1
PF3D7_1331000	N/A	protein kinase, putative
PF3D7_1331400	N/A	CPW-WPC family protein
PF3D7_1331500	N/A	ATF7-int domain-containing protein, putative
PF3D7_1332200	N/A	conserved protein, unknown function
PF3D7_1334900	N/A	MSP7-like protein, fragment, pseudogene
PF3D7_1335000	MSRP1	MSP7-like protein
PF3D7_1335100	MSP7	merozoite surface protein 7
PF3D7_1335200	RH6	reticulocyte binding protein homologue 6, pseudogene
PF3D7_1335300	RH2b	reticulocyte binding protein 2 homologue b
PF3D7_1335400	RH2a	reticulocyte binding protein 2 homologue a
PF3D7_1337700	PH2	phosphoinositide-binding protein PH2
PF3D7_1337800	CDPK5	calcium-dependent protein kinase 5
PF3D7_1339200	N/A	tRNA Proline
PF3D7_1341500	ISC1	inner membrane complex suture component, putative
PF3D7_1341800	IMC1k	inner membrane complex protein 1k, putative
PF3D7_1342500	SPECT1	sporozoite protein essential for cell traversal
PF3D7_1342600	MyoA	myosin A
PF3D7_1343100	N/A	conserved Plasmodium protein, unknown function
PF3D7_1343800	N/A	VPS13 domain-containing protein, putative
PF3D7_1344100	N/A	TLD domain-containing protein, putative
PF3D7_1344300	N/A	zinc finger protein, putative
PF3D7_1345600	N/A	inner membrane complex protein
PF3D7_1348000	N/A	conserved Plasmodium protein, unknown function
PF3D7_1348600	N/A	conserved Plasmodium protein, unknown function
PF3D7_1350600	N/A	conserved Plasmodium protein, unknown function
PF3D7_1351700	IMC1f	inner membrane complex protein 1f, putative
PF3D7_1352100	ABCB6	ABC transporter B family member 6, putative
PF3D7_1352200	UTP15	U3 small nucleolar RNA-associated protein 15, putative
PF3D7_1352900	N/A	Plasmodium exported protein, unknown function
PF3D7_1353200	MAHRP2	membrane associated histidine-rich protein 2
PF3D7_1356500	N/A	conserved Plasmodium protein, unknown function
PF3D7_1356800	ARK3	serine/threonine protein kinase ARK3, putative
PF3D7_1358300	ROM7	rhomboid protease ROM7, putative
PF3D7_1358600	N/A	zinc finger protein, putative
PF3D7_1359800	N/A	ADP-ribosylation factor, putative
PF3D7_1361400	ADF2	actin-depolymerizing factor 2
PF3D7_1361500	N/A	PH domain-containing protein, putative
PF3D7_1361800	GAC	glideosome-associated connector
PF3D7_1365600	TOP6B	DNA topoisomerase 6 subunit B
PF3D7_1366100	DIP13	DIP13 homolog, putative
PF3D7_1370900	N/A	non-coding RNA
PF3D7_1371600	EBL1	erythrocyte binding like protein 1, pseudogene
PF3D7_1401100	N/A	DnaJ protein, putative
PF3D7_1401400	ETRAMP14	early transcribed membrane protein 14.1
PF3D7_1401600	N/A	Plasmodium exported protein (PHISTb), unknown function
PF3D7_1401700	N/A	conserved Plasmodium protein, unknown function
PF3D7_1401900	N/A	conserved protein, unknown function
PF3D7_1404700	N/A	cysteine-rich small secreted protein CSS, putative
PF3D7_1404800	N/A	conserved Plasmodium protein, unknown function
PF3D7_1405700	N/A	RING zinc finger protein, putative
PF3D7_1406800	GAPM3	glideosome associated protein with multiple membrane spans 3
PF3D7_1407700	N/A	conserved protein, unknown function
PF3D7_1409400	N/A	conserved protein, unknown function
PF3D7_1410400	RAP1	rhoptry-associated protein 1
PF3D7_1410800	N/A	ankyrin-repeat protein, putative
PF3D7_1411000	N/A	conserved Plasmodium protein, unknown function
PF3D7_1411200	ROM8	rhomboid protease ROM8
PF3D7_1412000	N/A	p1/s1 nuclease, putative
PF3D7_1413700	N/A	DET1 domain-containing protein, putative
PF3D7_1413800	DPH1	diphthamide biosynthesis protein 1, putative
PF3D7_1415100	N/A	conserved protein, unknown function
PF3D7_1416500	GDH1	NADP-specific glutamate dehydrogenase
PF3D7_1417400	EPAC	rap guanine nucleotide exchange factor, putative, pseudogene
PF3D7_1423100	N/A	ankyrin-repeat protein, putative
PF3D7_1423300	PP7	serine/threonine protein phosphatase 7
PF3D7_1423400	N/A	conserved Plasmodium membrane protein, unknown function
PF3D7_1425400	N/A	DEAD/DEAH box helicase, putative
PF3D7_1425500	N/A	conserved Plasmodium protein, unknown function
PF3D7_1426500	ABCG2	ABC transporter G family member 2
PF3D7_1427100	N/A	lipase, putative
PF3D7_1430200	PMIX	plasmepsin IX
PF3D7_1430500	N/A	conserved Plasmodium protein, unknown function
PF3D7_1431400	SRA	surface-related antigen SRA
PF3D7_1434400	N/A	conserved protein, unknown function
PF3D7_1435200	N/A	conserved protein, unknown function
PF3D7_1435600	N/A	conserved Plasmodium protein, unknown function
PF3D7_1436200	BCP1	basal complex protein BCP1
PF3D7_1436300	PTEX150	translocon component PTEX150
PF3D7_1436600	PKG	cGMP-dependent protein kinase
PF3D7_1437300	N/A	conserved Plasmodium protein, unknown function
PF3D7_1438800	MD1	male development protein MD1
PF3D7_1439500	ORP2	oocyst rupture protein 2, putative
PF3D7_1440900	N/A	conserved Plasmodium protein, unknown function
PF3D7_1446100	N/A	conserved Plasmodium protein, unknown function
PF3D7_1447500	IMC20	inner membrane complex protein, putative
PF3D7_1449200	N/A	conserved Plasmodium protein, unknown function
PF3D7_1449600	N/A	conserved protein, unknown function
PF3D7_1451600	LAP5	LCCL domain-containing protein
PF3D7_1452000	RON2	rhoptry neck protein 2
PF3D7_1455000	PPM3	protein phosphatase PPM3, putative
PF3D7_1455300	N/A	conserved protein, unknown function
PF3D7_1455600	FER2	ferlin, putative
PF3D7_1459900	N/A	rhoptry protein, putative
PF3D7_1460000	HCS2	biotin--protein ligase 2
PF3D7_1460600	ISP3	inner membrane complex sub-compartment protein 3
PF3D7_1461400	N/A	MORN repeat protein, putative
PF3D7_1463600	N/A	conserved Plasmodium protein, unknown function
PF3D7_1463900	RON11	rhoptry neck protein 11, putative
PF3D7_1466000	N/A	conserved protein, unknown function
PF3D7_1468400	CZIF1	C3H1-type zinc finger protein CZIF1
PF3D7_1469200	SHLP1	shewanella-like protein phosphatase 1, putative
PF3D7_1471500	TMEM43	transmembrane protein 43, putative
PF3D7_1472500	N/A	conserved Plasmodium protein, unknown function
PF3D7_1472600	PDI-14	protein disulfide-isomerase
PF3D7_1473400	N/A	conserved protein, unknown function
PF3D7_1475500	CCp1	LCCL domain-containing protein
PF3D7_1475800	N/A	conserved Plasmodium protein, unknown function
PF3D7_1475900	N/A	KELT protein
PF3D7_1476300	N/A	Plasmodium exported protein (PHISTb), unknown function
PF3D7_1477900	ACS1b	acyl-CoA synthetase, pseudogene
PF3D7_1478000	GEXP17	Plasmodium exported protein (PHISTa), unknown function
PF3D7_1478800	N/A	Plasmodium exported protein, unknown function

## Sheet: R stage_up-regulated genes
Gene ID	Gene Name	Product Description
PF3D7_0108900	N/A	non-coding RNA
PF3D7_0205000	N/A	conserved Plasmodium protein, unknown function
PF3D7_0304600	CSP	circumsporozoite (CS) protein
PF3D7_0412300	N/A	phosphopantothenoylcysteine synthetase, putative
PF3D7_0416600	PHBL	prohibitin-like protein PHBL, putative
PF3D7_0622000	N/A	conserved Plasmodium protein, unknown function
PF3D7_0632600	RIF	rifin, pseudogene
PF3D7_0728400	N/A	SDH5 domain-containing protein, putative
PF3D7_0918500	TR	telomerase RNA
PF3D7_0934200	N/A	conserved protein, unknown function
PF3D7_1000600	RIF	rifin
PF3D7_1030300	N/A	conserved Plasmodium protein, unknown function
PF3D7_1228600	MSP9	merozoite surface protein 9
PF3D7_1232400	N/A	CWC16 domain-containing protein, putative
PF3D7_1254400	RIF	rifin
PF3D7_1421150	N/A	C/D small nucleolar RNA
PF3D7_1455900	PPRD	polyprenol reductase
PF3D7_1480100	N/A	erythrocyte membrane protein 1 (PfEMP1), pseudogene

## Sheet: T stage_up-regulated genes
Gene ID	Gene Name	Product Description
PF3D7_0102200	RESA	ring-infected erythrocyte surface antigen
PF3D7_0114500	N/A	Plasmodium exported protein (hyp10), unknown function
PF3D7_0215300	ACS8	acyl-CoA synthetase
PF3D7_0218200	N/A	SUZ domain-containing protein, putative
PF3D7_0303600	Plrx	plasmoredoxin
PF3D7_0307000	N/A	small nucleolar RNA snoR03
PF3D7_0401800	PfD80	Plasmodium exported protein (PHISTb), unknown function
PF3D7_0601100	EPF3	exported protein family 3
PF3D7_0614600	N/A	conserved Plasmodium protein, unknown function
PF3D7_0701900	N/A	Plasmodium exported protein, unknown function
PF3D7_0726200	FIKK7.1	serine/threonine protein kinase, FIKK family
PF3D7_0800800	N/A	Plasmodium exported protein (hyp7), unknown function
PF3D7_0832200	N/A	Plasmodium exported protein (PHISTa-like), unknown function
PF3D7_0935600	GIG	gametocytogenesis-implicated protein
PF3D7_0936400	REX4	ring-exported protein 4
PF3D7_0936900	N/A	Plasmodium exported protein (PHISTb), unknown function, pseudogene
PF3D7_0937400	RIF	rifin
PF3D7_1000600	RIF	rifin
PF3D7_1003900	N/A	dynein attachment factor-domain containing protein, putative
PF3D7_1039100	N/A	DnaJ protein, putative, pseudogene
PF3D7_1100700	N/A	stevor, pseudogene
PF3D7_1149200	RESA3	ring-infected erythrocyte surface antigen
PF3D7_1240100	ETRAMP12	early transcribed membrane protein 12
PF3D7_1315000	N/A	conserved protein, unknown function
PF3D7_1401500	N/A	esterase, putative
PF3D7_1402600	N/A	small nucleolar RNA snoR22
PF3D7_1424200	N/A	small nucleolar RNA snoR25
PF3D7_1424500	N/A	small nucleolar RNA snoR27
PF3D7_1424600	N/A	small nucleolar RNA snoR28
PF3D7_1476900	N/A	Plasmodium exported protein, unknown function, pseudogene
PF3D7_1479800	RIF	rifin

## Sheet: S stage_up-regulated genes
Gene ID	Gene Name	Product Description
PF3D7_0107700	N/A	dolichyl-diphosphooligosaccharide--protein glycosyltransferase subunit OST3/OST6, putative
PF3D7_0110900	AKLP1	adenylate kinase-like protein 1
PF3D7_0112300	N/A	18S ribosomal RNA
PF3D7_0112700	N/A	28S ribosomal RNA
PF3D7_0213800	N/A	conserved protein, unknown function
PF3D7_0218100	N/A	conserved protein, unknown function
PF3D7_0223100	RIF	rifin
PF3D7_0303600	Plrx	plasmoredoxin
PF3D7_0314300	DER1-2	DER1-like protein
PF3D7_0412800	N/A	Plasmodium RNA of unknown function RUF6
PF3D7_0413000	N/A	Plasmodium RNA of unknown function RUF6
PF3D7_0422600	N/A	conserved Plasmodium protein, unknown function
PF3D7_0502800	N/A	DnaJ protein, putative
PF3D7_0510900	N/A	small nucleolar RNA snoR04
PF3D7_0511900	N/A	conserved Plasmodium protein, unknown function
PF3D7_0512700	OPRT	orotate phosphoribosyltransferase
PF3D7_0512900	AKAL	AKAP-like protein
PF3D7_0523700	N/A	conserved Plasmodium membrane protein, unknown function
PF3D7_0526100	N/A	conserved Plasmodium membrane protein, unknown function
PF3D7_0530700	N/A	conserved Plasmodium protein, unknown function
PF3D7_0531600	N/A	18S ribosomal RNA
PF3D7_0531800	N/A	5.8S ribosomal RNA
PF3D7_0532000	N/A	28S ribosomal RNA
PF3D7_0604800	N/A	RAP protein, putative
PF3D7_0610700	N/A	conserved Plasmodium protein, unknown function
PF3D7_0626200	N/A	conserved Plasmodium protein, unknown function
PF3D7_0630500	YTM1	ribosome biogenesis protein YTM1, putative
PF3D7_0706600	N/A	conserved Plasmodium protein, unknown function
PF3D7_0707420	N/A	nucleolar RNA snoR36
PF3D7_0725600	N/A	18S ribosomal RNA
PF3D7_0725800	N/A	5.8S ribosomal RNA
PF3D7_0726000	N/A	28S ribosomal RNA
PF3D7_0801100	N/A	28S ribosomal RNA
PF3D7_0801200	N/A	5.8S ribosomal RNA
PF3D7_0817100	N/A	tRNA modification GTPase, putative
PF3D7_0819300	N/A	conserved Plasmodium protein, unknown function
PF3D7_0822100	MED7	mediator of RNA polymerase II transcription subunit 7, putative
PF3D7_0823700	TOM7	mitochondrial import receptor subunit TOM7, putative
PF3D7_0826000	N/A	conserved Plasmodium protein, unknown function
PF3D7_0826800	N/A	small nucleolar RNA snoR05
PF3D7_0829700	N/A	non-coding RNA
PF3D7_0830200	N/A	28S ribosomal RNA
PF3D7_0831000	GEXP09	Plasmodium exported protein (PHISTb), unknown function
PF3D7_0901900	N/A	probable protein, unknown function
PF3D7_0906890	N/A	conserved Plasmodium protein, unknown function
PF3D7_0915500	N/A	conserved Plasmodium protein, unknown function
PF3D7_0917700	N/A	GPN-loop GTPase, putative
PF3D7_0919600	WBP1	dolichyl-diphosphooligosaccharide--protein glycosyltransferase subunit WBP1, putative
PF3D7_0921100	N/A	conserved Plasmodium protein, unknown function
PF3D7_0921500	N/A	conserved Plasmodium protein, unknown function
PF3D7_0922400	pBAS	para-aminobenzoic acid synthetase
PF3D7_1001300	N/A	Plasmodium exported protein (PHISTa), unknown function
PF3D7_1022300	ZIPCO	ZIP domain-containing protein, putative
PF3D7_1026900	HCS1	biotin--protein ligase 1
PF3D7_1029000	N/A	conserved Plasmodium protein, unknown function, pseudogene
PF3D7_1108900	N/A	tetratricopeptide repeat protein, putative
PF3D7_1111700	N/A	conserved Plasmodium protein, unknown function
PF3D7_1130310	N/A	small nucleolar RNA snoR14a
PF3D7_1135600	CAPD3	condensin-2 complex subunit D3, putative
PF3D7_1139200	N/A	VPS9 domain-containing protein, putative
PF3D7_1139500	N/A	AAA family ATPase, putative
PF3D7_1148600	N/A	18S ribosomal RNA
PF3D7_1148640	N/A	28S ribosomal RNA
PF3D7_1149000	Pf332	antigen 332, DBL-like protein
PF3D7_1209100	N/A	conserved Plasmodium protein, unknown function
PF3D7_1210800	N/A	small nucleolar RNA snoR14
PF3D7_1212200	N/A	conserved protein, unknown function
PF3D7_1230200	N/A	vacuolar transporter chaperone, putative, pseudogene
PF3D7_1230500	N/A	WD repeat-containing protein, putative
PF3D7_1242100	N/A	conserved Plasmodium protein, unknown function
PF3D7_1244300	N/A	ACEA small nucleolar RNA U3
PF3D7_1245200	N/A	conserved Plasmodium membrane protein, unknown function
PF3D7_1245900	N/A	ankyrin-repeat protein, putative
PF3D7_1248800	N/A	conserved Plasmodium protein, unknown function
PF3D7_1304300	N/A	conserved Plasmodium protein, unknown function
PF3D7_1305700	N/A	conserved Plasmodium protein, unknown function
PF3D7_1309600	N/A	ribosomal RNA methyltransferase, putative
PF3D7_1309900	N/A	succinate dehydrogenase assembly factor 2, putative
PF3D7_1310000	OSCP	ATP synthase subunit O, mitochondrial, putative
PF3D7_1310100	N/A	conserved Plasmodium protein, unknown function
PF3D7_1313900	N/A	ankyrin-repeat protein, putative
PF3D7_1333500	N/A	conserved Plasmodium protein, unknown function
PF3D7_1334500	MSRP6	MSP7-like protein
PF3D7_1338500	N/A	conserved Plasmodium protein, unknown function
PF3D7_1341100	N/A	U6 spliceosomal RNA
PF3D7_1342200	N/A	conserved Plasmodium membrane protein, unknown function
PF3D7_1349900	N/A	conserved Plasmodium protein, unknown function
PF3D7_1360400	N/A	conserved Plasmodium protein, unknown function
PF3D7_1365400	UBA4	adenylyltransferase and sulfurtransferase UBA4, putative
PF3D7_1371000	N/A	18S ribosomal RNA
PF3D7_1371300	N/A	28S ribosomal RNA
PF3D7_1408300	N/A	conserved Plasmodium protein, unknown function
PF3D7_1409800	CELF2	CUGBP Elav-like family member 2, putative
PF3D7_1418800	N/A	signal recognition particle RNA
PF3D7_1424300	N/A	small nucleolar RNA snoR26
PF3D7_1431800	E-NTPDase	apyrase, putative
PF3D7_1436400	N/A	conserved Plasmodium protein, unknown function
PF3D7_1444600	N/A	conserved Plasmodium protein, unknown function
PF3D7_1444900	N/A	conserved protein, unknown function
PF3D7_1447400	N/A	conserved Plasmodium protein, unknown function
PF3D7_1456200	N/A	conserved Plasmodium protein, unknown function
PF3D7_1456300	N/A	conserved Plasmodium protein, unknown function
PF3D7_1458800	N/A	DNA-directed RNA polymerase III subunit RPC5, putative
PF3D7_1459500	N/A	conserved Plasmodium protein, unknown function
PF3D7_1461000	N/A	conserved Plasmodium protein, unknown function
PF3D7_1462500	N/A	conserved Plasmodium protein, unknown function
PF3D7_1468900	N/A	zinc finger protein, putative
PF3D7_1469500	N/A	conserved Plasmodium protein, unknown function
PF3D7_1474200	N/A	conserved Plasmodium membrane protein, unknown function
PF3D7_1475000	MED31	mediator of RNA polymerase II transcription subunit 31, putative
PF3D7_API04900	N/A	large subunit ribosomal RNA
PF3D7_API05700	N/A	small subunit ribosomal RNA
PF3D7_API05900	N/A	small subunit ribosomal RNA
PF3D7_API06700	N/A	large subunit ribosomal RNA
